# Supplementary figures and images for: Delayed tunneling of charges to deep traps in a ZnO impurity containing Cr3+ doped Zn2TiO4 inverse spinel
Source: Royal Society of Chemistry journal article supplement (doi:10.1039/d4cp01469c), 2024-01-01

Emission at 716 nm

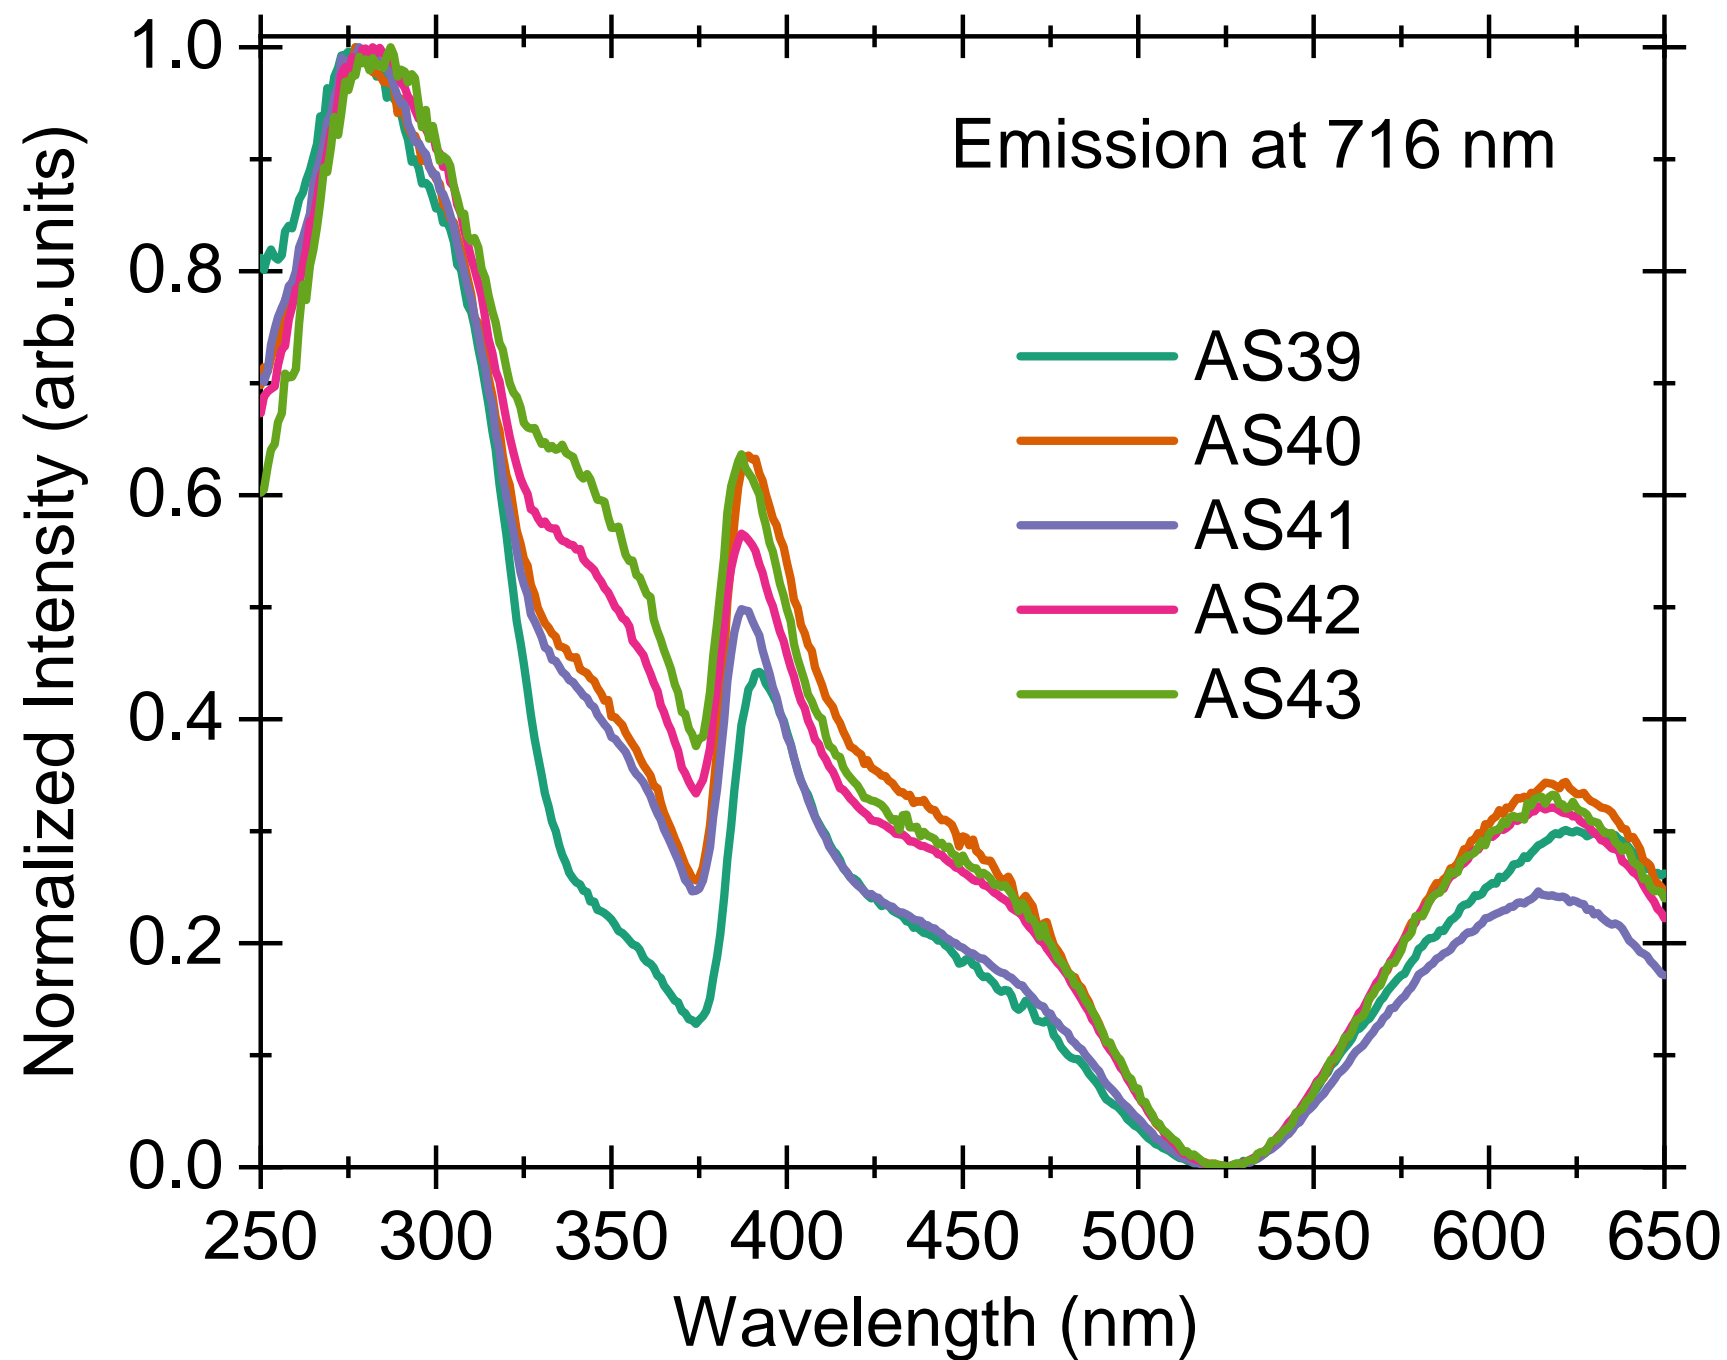

Supplement: d4cp01469c1.zip [file d4cp01469c1.zip]

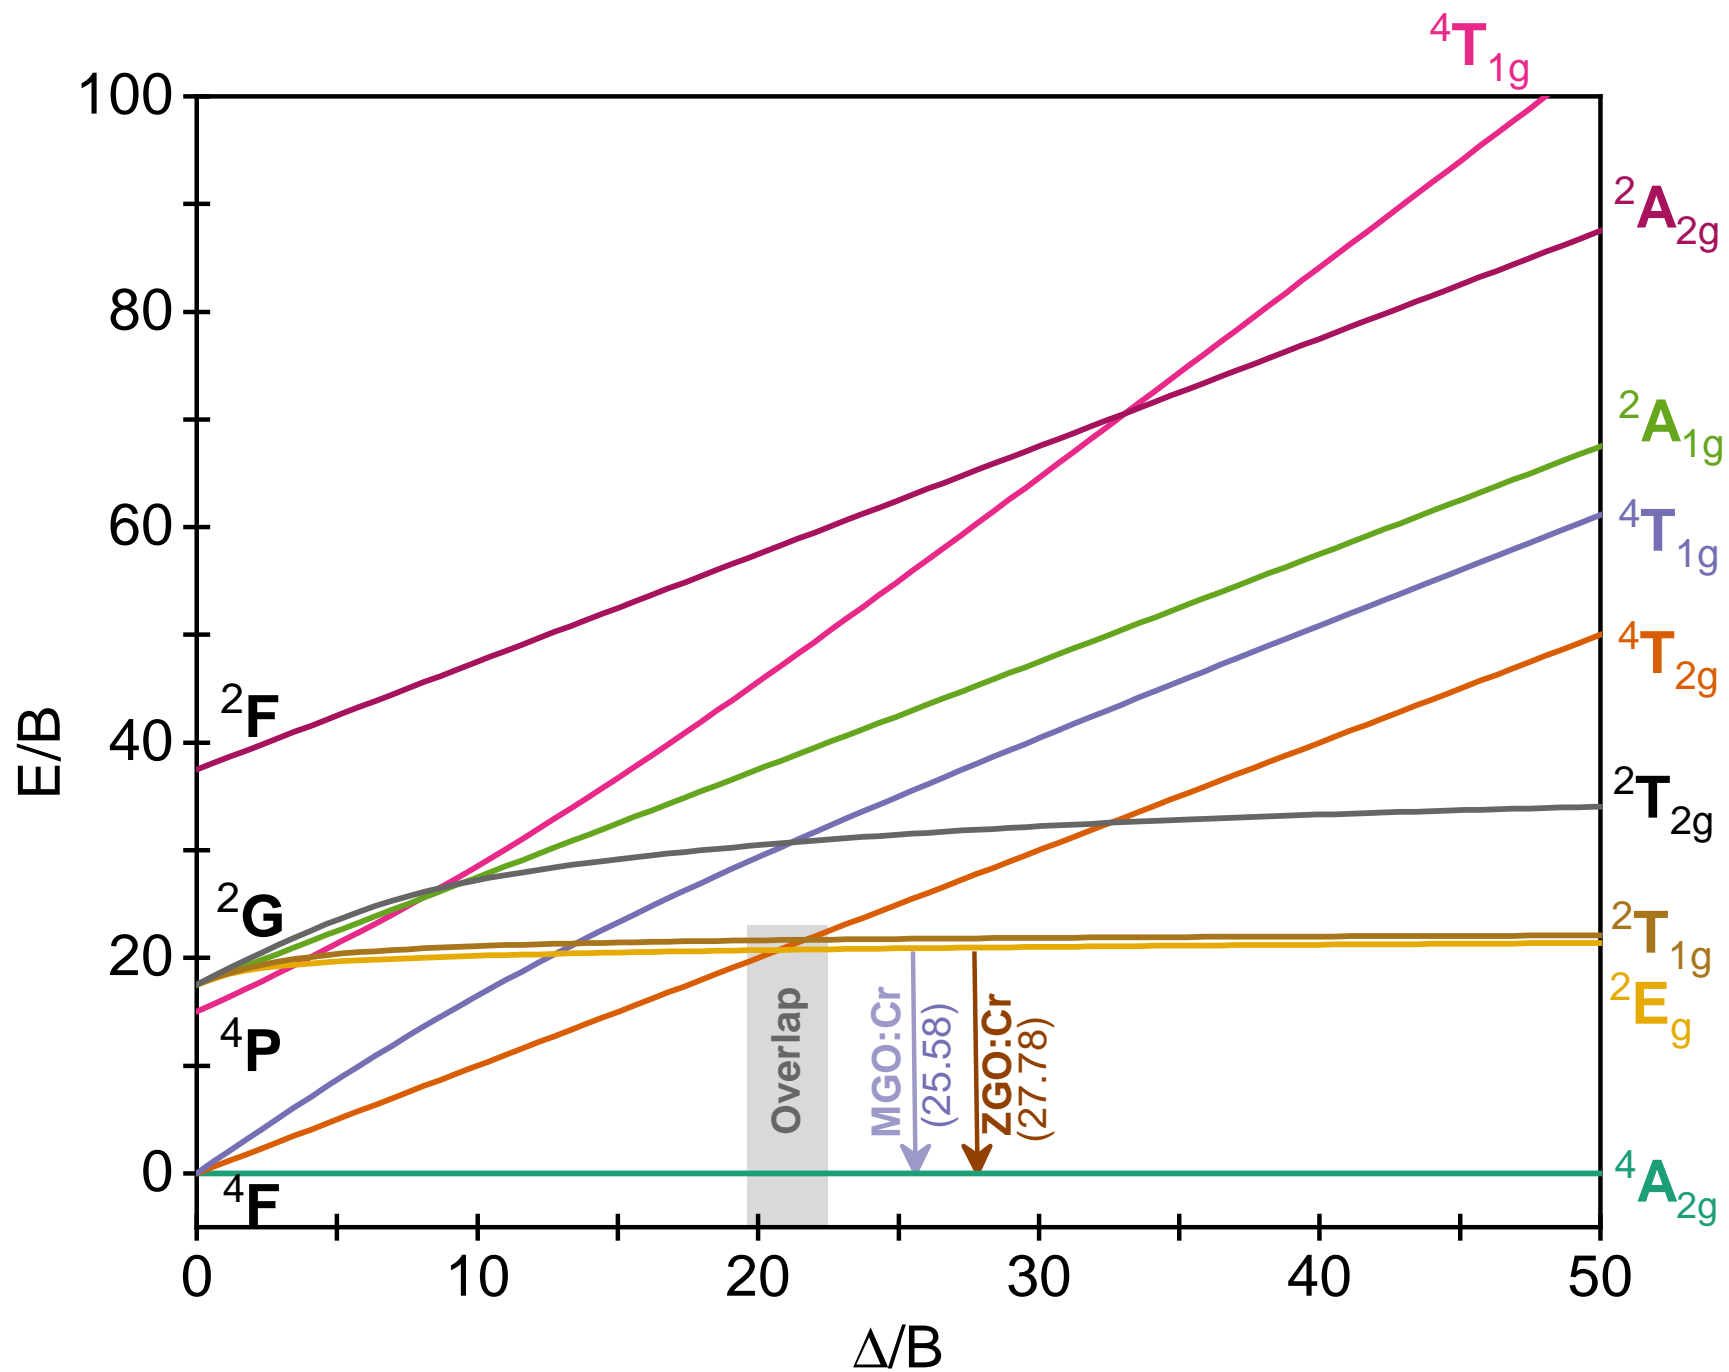

Supplement: d4cp01469c1.zip [file d4cp01469c1.zip]

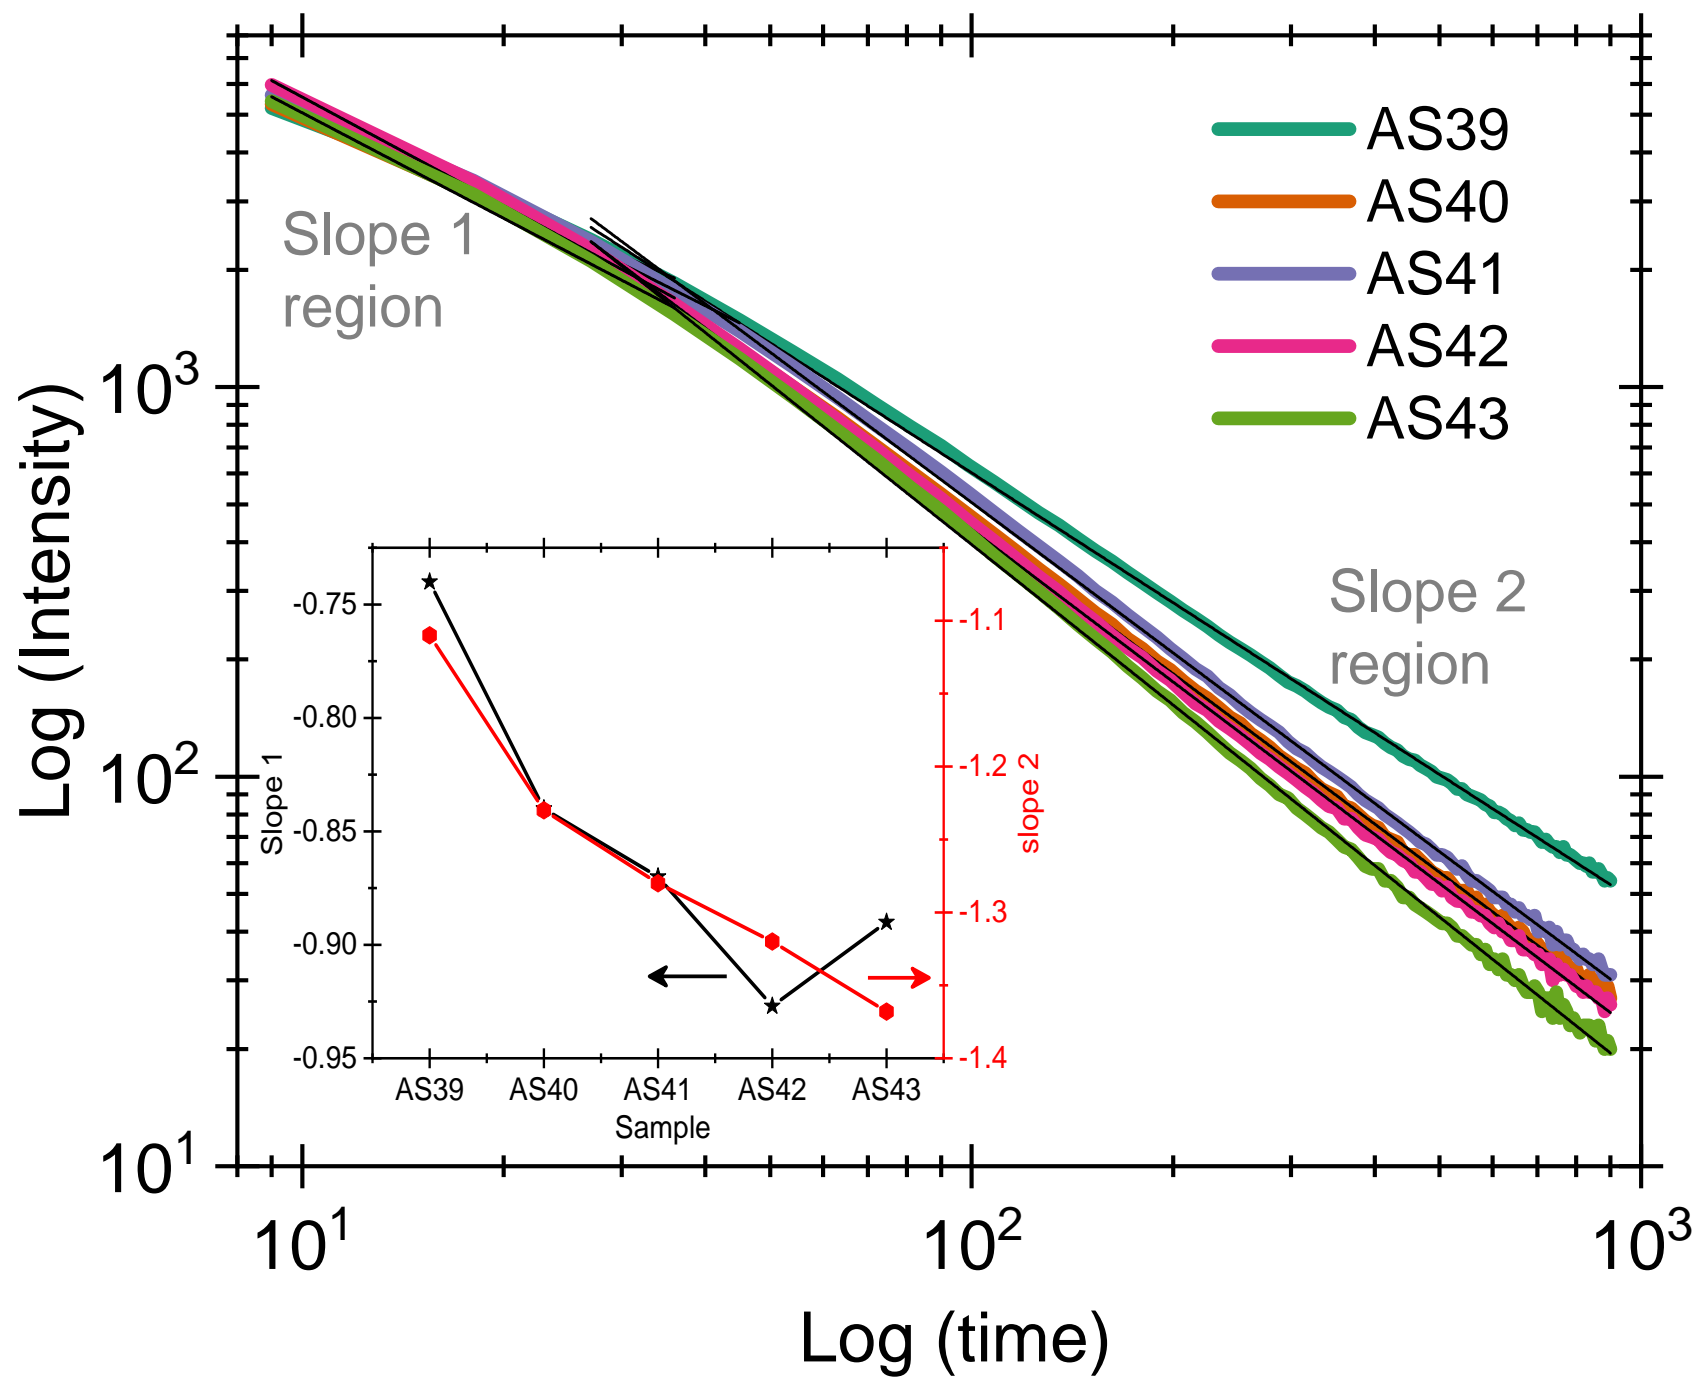

Supplement: d4cp01469c1.zip [file d4cp01469c1.zip]

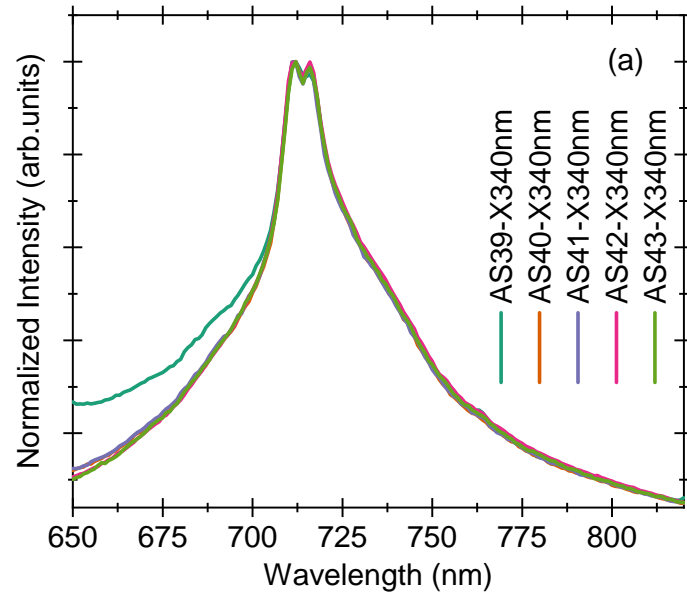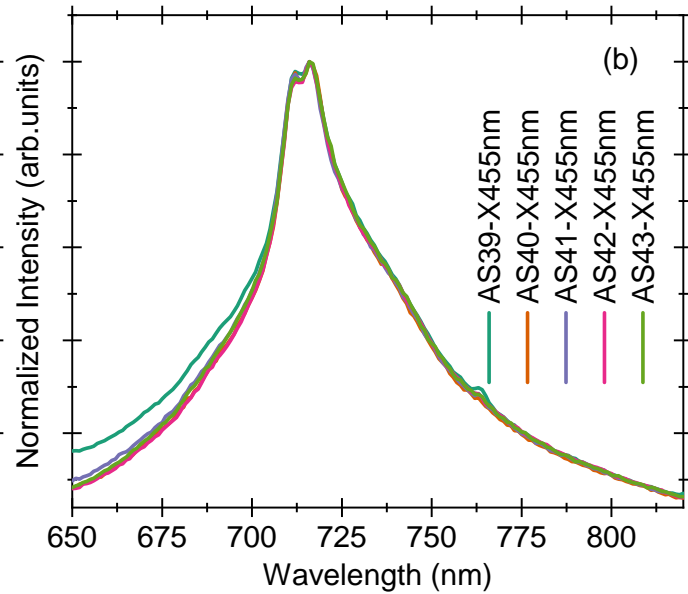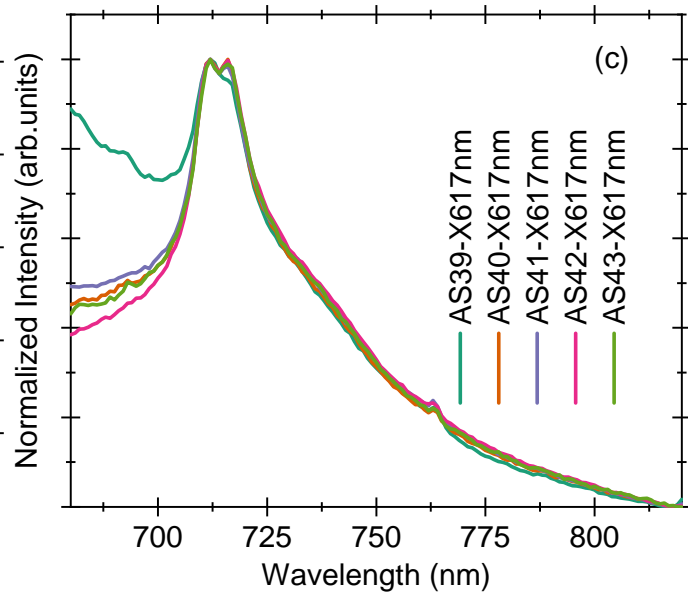

Supplement: d4cp01469c1.zip [file d4cp01469c1.zip]

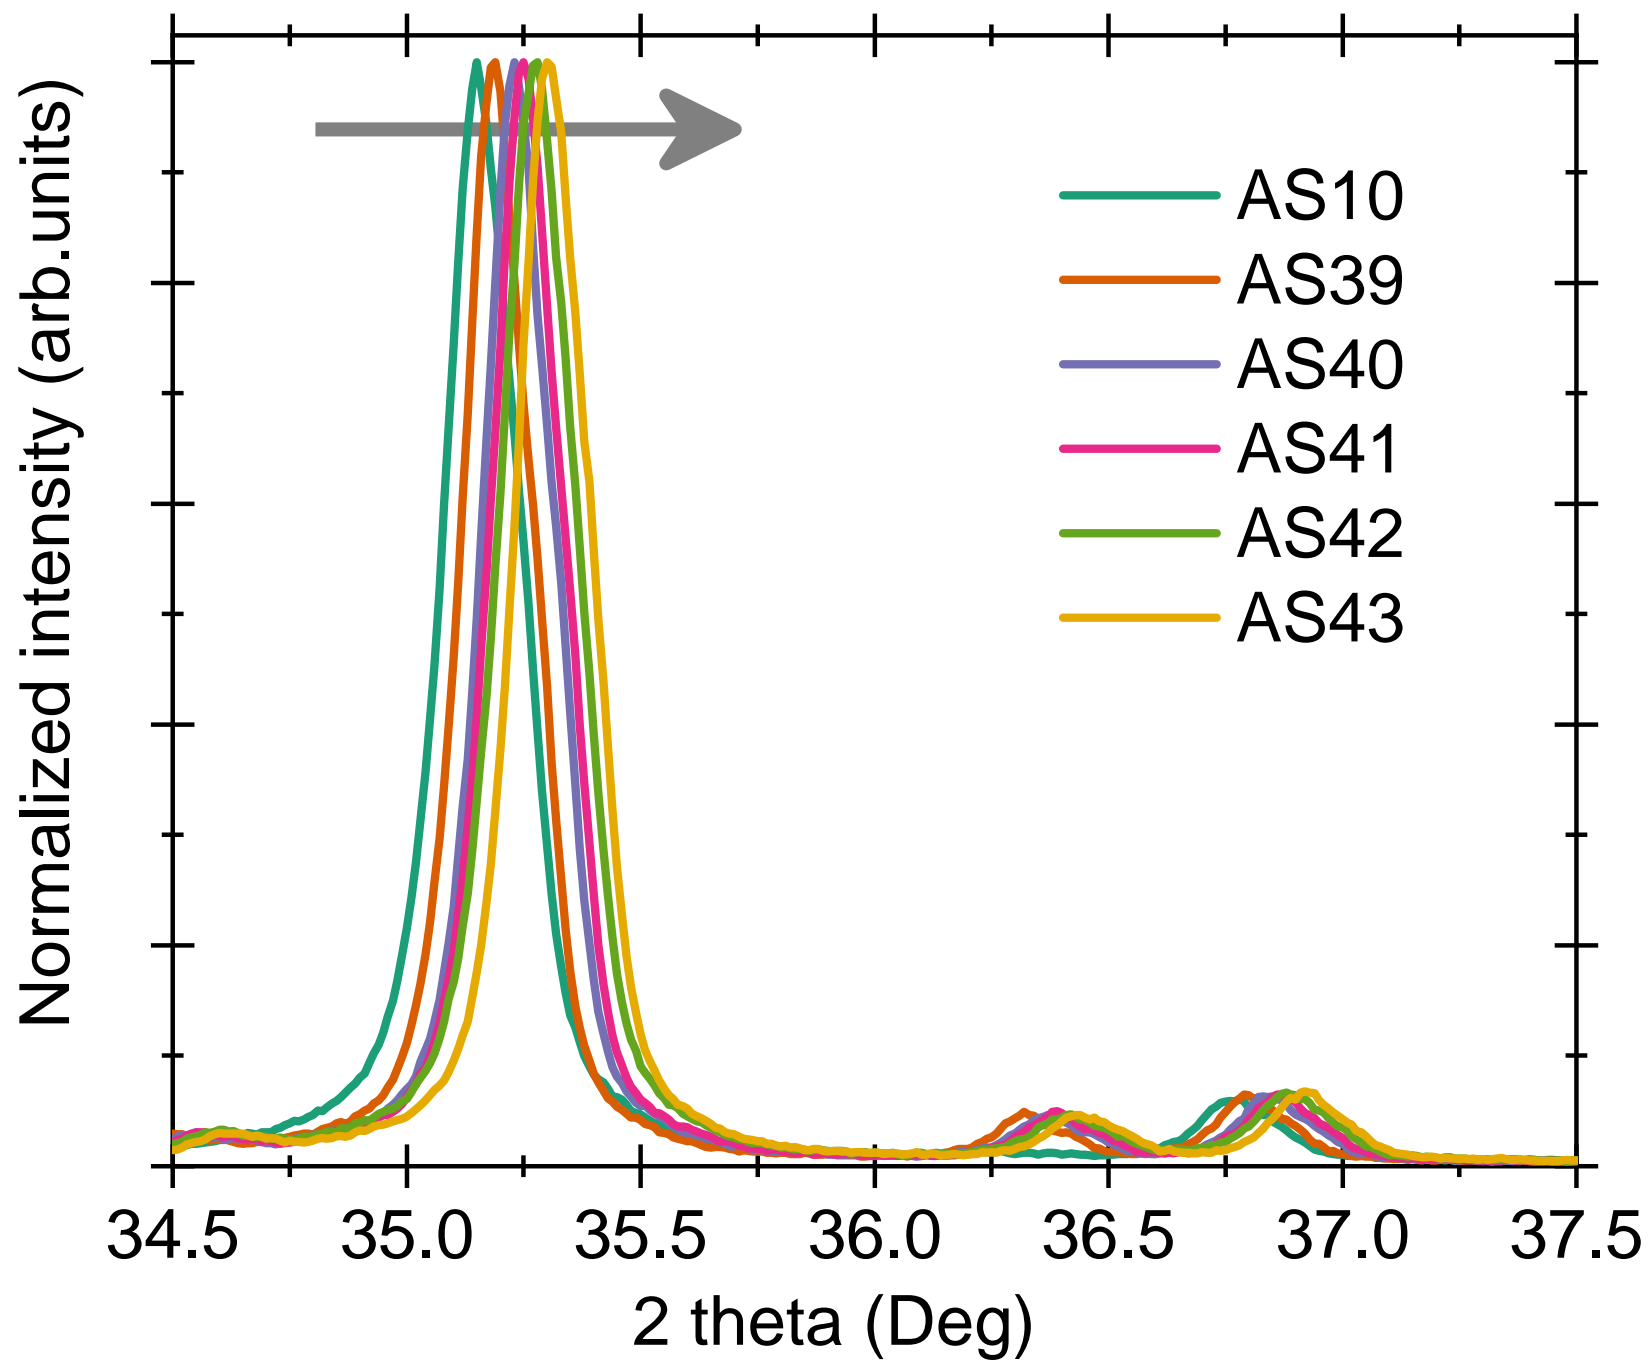

Supplement: d4cp01469c1.zip [file d4cp01469c1.zip]

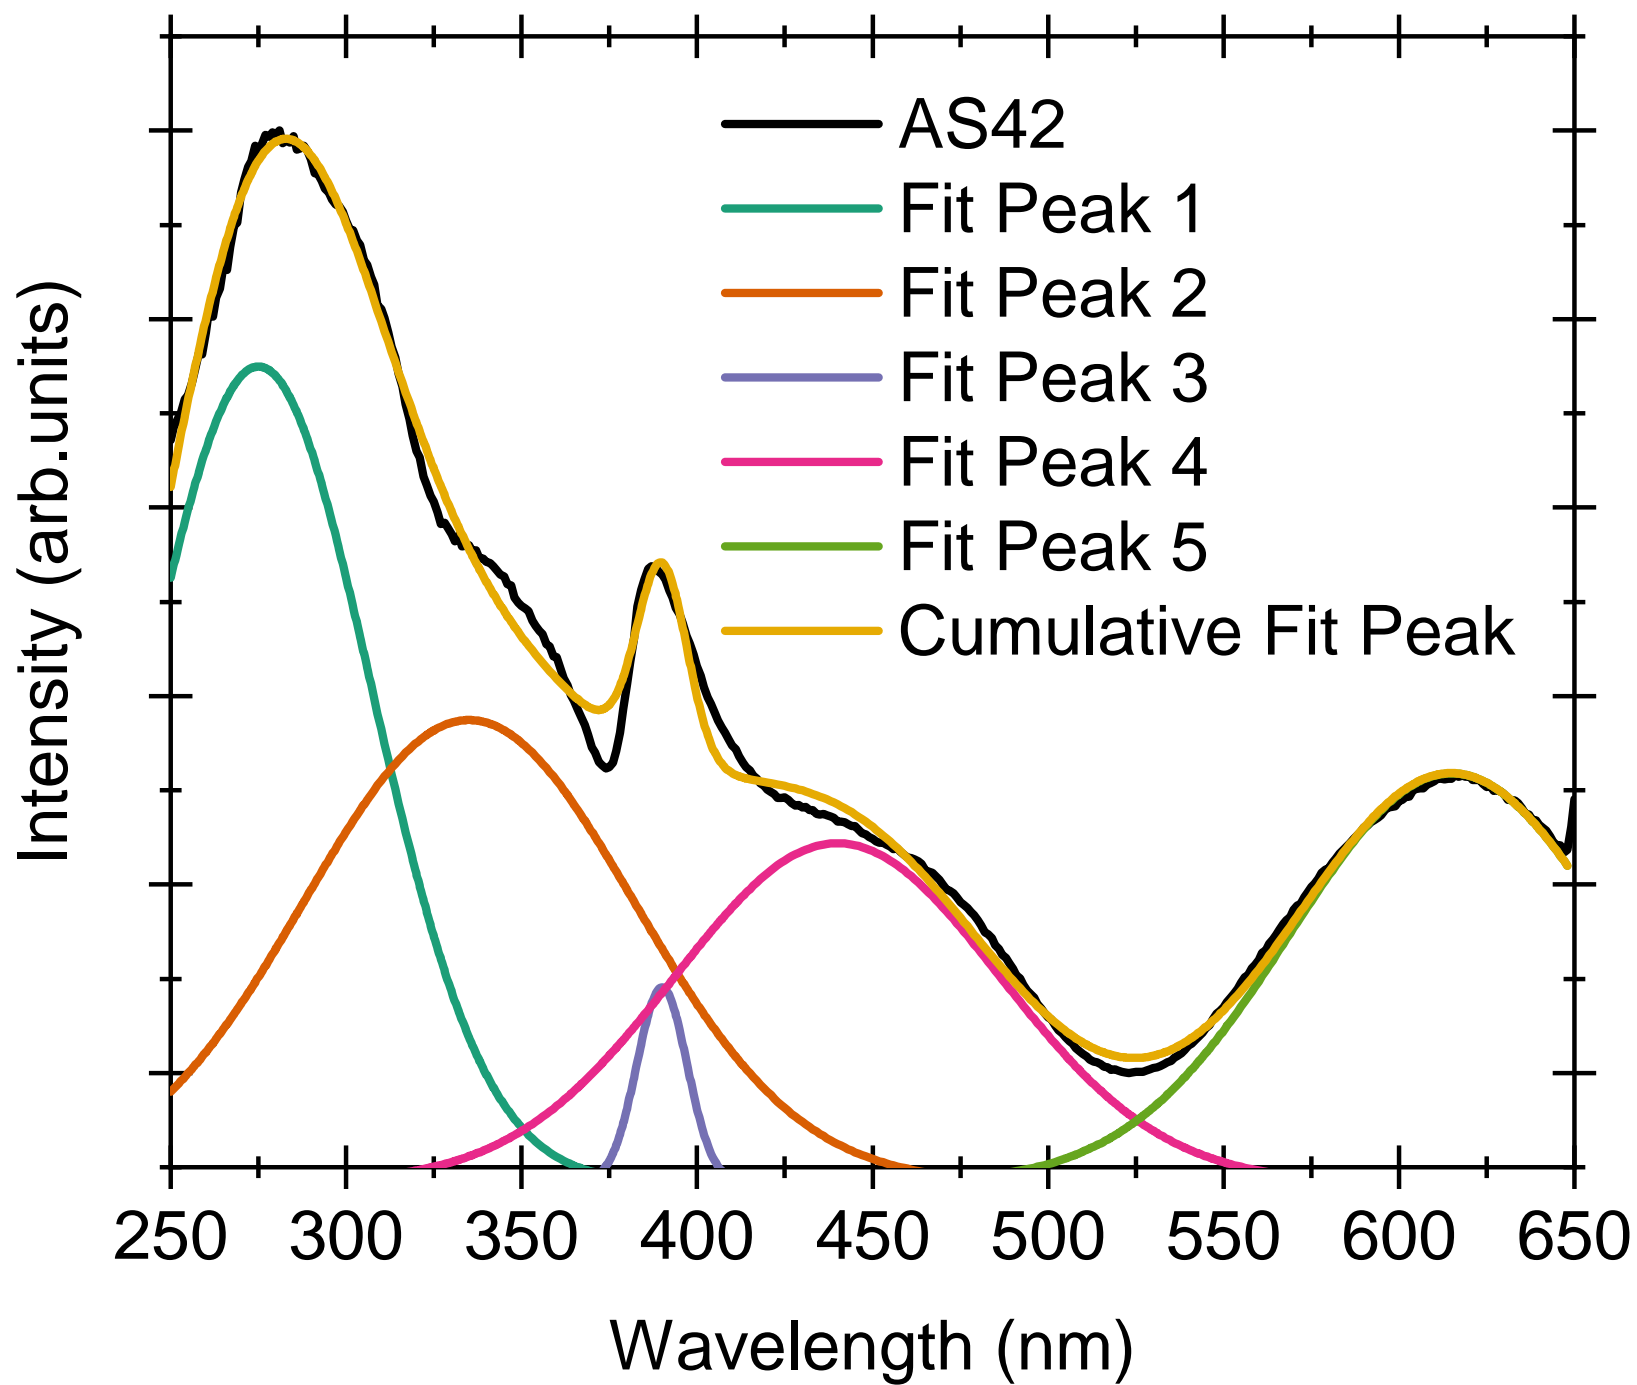

Supplement: d4cp01469c1.zip [file d4cp01469c1.zip]
